Carol Wiley Cassella, M.D., Editor

## The ASA 4 Patient at the VA Hospital

Audrey Shafer, M.D.

Dread is the pile of stones I carry in my chest  
each diseased organ, each hardened vessel  
a stone in the sepulcher  
his heart sags large and tired  
tar flecks his lungs  
his gangrenous toe a granite shim  
wedged into the growing pyramid  
numbers thump like a mason's hammer  
91, 2.1, 29, 30  
the cairn demands more stones  
hepatitis, stroke  
early dementia seeps  
like concrete poured into crevices  
dread: the pile of stones I carry in my chest

From the Stanford University School of Medicine and Veterans Affairs Palo Alto Health Care System, Palo Alto, California. ashafer@stanford.edu

Accepted for publication May 30, 2014.

Copyright © 2014, the American Society of Anesthesiologists, Inc. Wolters Kluwer Health, Inc. All Rights Reserved. Anesthesiology 2015; 122:950-1

his aging wife, a tiny bird, flutters about him  
she primps his pillow, knows to not ask questions  
my patient cracks a joke  
he's made me smile  
I push him on his gurney  
and for a brief shining moment  
before we enter the operating room  
we disappear at the turn  
into the glare of the morning sun
